# Supplementary material for: Management of atrial fibrillation in seven European countries after the publication of the 2010 ESC Guidelines on atrial fibrillation: primary results of the PREvention oF thromboemolic events—European Registry in Atrial Fibrillation (PREFER in AF)
Source: PubMed Central journal article supplement — Europace. 2013 Oct 1;16(1):6–14. doi: 10.1093/europace/eut263 (PMC3864758; doi:10.1093/europace/eut263), 2013-10-01
Supplement: supp_eut263_eut263supp.pdf [file supp_eut263_eut263supp.pdf]

**Appendix: Study sites.****Austria**

Bernd Eber, Klinikum Wels-Grieskirchen, Wels; Marianne Gwechenberger, AKH, Universitätsklinik für Innere Medizin, Wien; Michael Hirschl, Landeskliniken Zwettl, Zwettl; Kurt Huber, Wilhelminenspital, Wien; Franz Xaver Roithinger, Landeskrankenhaus Thermenregion Mödling, Mödling; Bernhard Strohmer, Landeskrankenhaus Salzburg, Salzburg.

**France**

Reda Aarras, Cabinet Medical, Beausoleil; Michel Adda, Cabinet Medical, Nice; Benaissa Agraou, Centre hospitalier Valenciennes, Valenciennes; Walid-Mohamed Amara, CH de Montfermeil, Montfermeil; Gladys Amiel Oster, Cabinet Medical, Auervilliers; Pierre Attali, Hopitaux Universitaires de Strassbourg, Strassbourg Cedex; Philippe Audouin, Cabinet Medical, Paris; Olivier Azzano, Centre Hospitalier Alpes Léman, Contamine-Sur-Arve; Hugues Bader, Hopital Francois Mitterand, Pau; Frédéric Baylac-Domengetroy, Cabinet Medical, Chateaubernard; Philippe Berdague, Cabinet Medical, Beziers; Jean-Baptiste Berneau, Cabinet Medical, Bayonne; Didier Binet, Cabinet Medical, Valognes; Pascale Bliscaux, Cabinet Medical, St Avold; Thierry Bontemps, Cabinet Medical, Limoges Cedex 1; Khaled Bouchlaghem, Cabinet Medical, Marseille; Luc Brottier, Cabinet Medical, Biarritz; François Brumelot, Cabinet Medical, Grenoble; Sylvie Castagnié Sergheraert, Cabinet Medical, Langon; Jean Pierre Cebron, Nouvelles Cliniques Nantaises, Nantes Cedex 2; Isabelle Centa, Cabinet Medical, Le Kremlin Bicetre; Alexis Charasse, Cabinet Medical, Annecy-Le-Vieux; Philippe Chemin, Polyclinique Bordeaux Cauderan, Bordeaux; Roger Chokron, Cabinet Medical, Paris; Angelica Ciausu, Cabinet Medical, Draguignan; Marie-Rose Clergeau, Clinique Axium, Aix En Provence; Adib Dabboura, Cabinet Medical, Villefranche Sur Saone; Jean-Maurice Dahan, Cabinet Medical, Cagnes/Mer; Patrick Dary, Cabinet Medical, St Yrieix La Perche; Jean-Marc Davy, Hospital Arnaud de Villeneuve. CHU, Montpellier; Pascal Defaye, CHU La Tronche, Grenoble Cedex 09; Philippe Dematteo, Cabinet Medical, Valognes; Jean-Luc Dequeker, Cabinet Medical, Bayonne; Pierre Dieuzaide, Cabinet Medical, Marseille; Antoine Dompnier, Centre hospitalier de la région d'Annecy, Pringy Cedex; Bernard Doucet, Cabinet Medical, Chambéry; Philippe Duc, Cabinet Medical, Fontenay Sous Bois; Philippe Egloff, Cabinet Medical, Bayonne; Abdel Latif El Hallak, Centre Cardiologique d'Evécquemont, Evécquemont; Rami El Mahmoud, Hôpital Ambroise Paré, Boulogne Billancourt Cedex; David Ennouchi, Cabinet Medical, Niort; Jérôme Fabre, Clinique la Casamance, Aubagne Cedex; Jean Louis Farges, Cabinet

Medical, Bethune; Laurent Fauchier, Hopital Trousseau, Tours; Israel Feldmann, Cabinet Medical, Haguenau; Laurent Fischbein, Cabinet Medical, Chelles; Eric Fournier, Cabinet Medical, Gap; Jean François Fournier, Cabinet Medical, Yvetot; Michal Galewicz, Polyclinique de Riaumont, Lievin Cedex; Thierry Garban, Cabinet Medical, Carquefou; Mathieu Gillet, Clinique Bretèche- Tour Socrate, Nantes Cedex 1; Thierry Gillet, Cabinet Medical, Toulon; Philippe Goineau, Cabinet Medical, Lyon; Antonio Gongora, Polyclinique de Riaumont, Liévin; Thomas Gouvion, Cabinet Medical, Selestat; Pierre Gueranger, Cabinet Medical, Villefranche De Rouergue; Olivier Hanon, H.Broca-La Rochefoucauld-La Collégiale, Paris; Olivier Hoffman, Cabinet Medical, Paris; Daniel Horovitz, Cabinet Medical, Savigny Sur Orge; Philippe Jacquier, Cabinet Medical, Grasse; Alain Josseron, Cabinet Medical, Le Tampon; Takeshi Kondo, Hopital Hotel Dieu, Paris Cedex 4; Fadi Labaki, Hopital de Freyming, Freyming Merlebach Cedex; Frederic Labedan, Cabinet Medical, Rueil Malmaison; Philippe Lang, Cabinet Medical, Mulhouse; Jean Michel Laudinat, Cabinet Medical, Carcassonne; Christian Leiber, Cabinet Medical, Mulhouse; Nicolas Ley, Cabinet Medical, Tarbes; Patrice Lichtenstein, Cabinet Medical, Juan Les Pins; Jean Louis Long, Cabinet Medical, Vichy; Christian Lorentz, Cabinet Medical, Belfort; Jean Christophe Louchart, Cabinet Medical, Bethune; Isabelle Mahe, Hôpital Louis Mourier, Colombes; Jacques Mansourati, CHRU Brest, Hopital de la Cavale Blanche, Brest Cedex 9; Michel Martelet, Centre hospitalier de Langres, Langres; Gerard Marthan, Cabinet Medical, Bordeaux; Nicolas Meneveau, CHU Besancon, Besancon; Zoubir Mesli, Maison Medicale Les Roses, Montpellier; Lionel Michaux, Cabinet Medical, Montigny Les Metz; Christopher Mielot, Centre de spécialistes, Plan De Cuques; Stéphane Mielot, Cabinet Medical, Marseille; Jean Luc Mougeolle, CH De Sedan, Sedan Cedex; Frederic Mouquet, Cabinet Medical, Lille; Jean-Joseph Muller, Cabinet Medical, Strasbourg; Ayi Napporn, Centre hospitalier Louis Pasteur, Dole Cedex; Eric Page, Clinique des Eaux Claires, Grenoble Cedex 1; Florence Pelier, Cabinet Medical, Arbois; Michel Pierre, Cabinet Medical, Nice; Alain Pinzani, Cabinet Medical, Sete; Alain Pleskof, Cabinet Medical, Chelles; François Poulain, Cabinet Medical, Paris; Vincent Puel, Cabinet de Cardiologue, Bordeaux; Patrice Raymond, Cabinet Medical, Asnieres Sur Seine; Jocelyne Robert Benzenou, Centre Cardio Vasculaire, Marseille; Christian Roche, Cabinet Medical, Saint Etienne; Maurice Saade, Cabinet Medical, Hesdin; Philippe Sainmont, Cabinet Medical, Frejus; Marc Sander, Cabinet Medical, St Germain En Laye; Raphael Sandras, Private practice, Reims; Youri Sayegh, Cabinet Medical, Lyon; Olivier Selton, Cabinet Medical, Toul; Igor Sibon, Hopital Pellegrin- CHU Bordeaux, Bordeaux; Olivier Stchepinsky, Centre Korian William Harvey, St Martin D Aubigny; Olivier Stora, Cabinet Medical, Nantes; Stéphane Tabet, Cabinet

Medical, Enghien Les Bains; Jean Tartar, Cabinet Medical, St. Pol Sur Mer; Alexandre Trigano, Cabinet Medical, Marseille; Denis Uzan, Cabinet Medical, Aulnay Sous Bois; Jean François Vitoux, Groupe Medical du Centre, Nanterre; Hubert Vodoungnon, Hôpital de Dunkerque, Dunkerque; Jean-Michel Walch, Cabinet Medical, Aulnay Sous Bois; Michel Weingrod, Maison Medicale Pierre Curie, Plaisir.

### **Germany**

Ayham Al-Zoebi, Kardiologische Praxis, Wermsdorf; Markus Baar, Praxis für Innere Medizin und Kardiologie, Northeim; Christian Barho, goMedus Gesundheitszentrum, Berlin; Peter Baron von Bilderling, Gefäßpraxis im Tal, München; Ralf Berg, Praxis für Allgemeinmedizin, Ühlingen-Birkendorf; Jan Beyer-Westendorf, Universitätsklinikum Carl Gustav Carus der TU Dresden, Dresden; Manfred Bock, Praxis für Innere Medizin, Chemnitz; Ralph Bosch, Cardio Centrum Ludwigsburg Bietigheim, Ludwigsburg; Dietmar Boscher, Praxis für Innere Medizin und Kardiologie, Biberach An Der Riß; Jochen Bott, Kardiologische Praxis, Berlin; Roland Braun, Praxis für Allgemeinmedizin, Unterschneidheim; Haico Brüning, Praxis für Innere Medizin und Kardiologie, Elmshorn; Walter Dauderer, Praxisgemeinschaft Dauderer, München; Christiane Demann, Fachpraxis für Innere Medizin, Hannover; Hans-Joachim Demmig, Gesundheitszentrum Hoppegarten, Facharztpraxis für Innere Medizin, Hoppegarten; Nancy Dierkes, Praxis für Innere Medizin, Dreieich; Mustafa Durak, Kardiologische Schwerpunktpraxis, Heidelberg; Hans-Holger Ebert, Kardiologische Gemeinschaftspraxis, Riesa; Ralf Engelhard, Internistische Gemeinschaftspraxis, Frankenberg; Andreas Förster, Gemeinschaftspraxis für Innere Medizin, Berlin; Stephan Fritz, Gemeinschaftspraxis, Hemau; Karsten Gericke, Kardiologische Praxis, Bad Lauterberg; Jürgen Glös, Innere Medizin Chemnitz, Chemnitz; Josef Großkopf, Gemeinschaftspraxis, Wallerfing; Jens Günther, Kardiocentrum Frankfurt an der Klinik Rotes Kreuz, Frankfurt; Rainer Häge, Praxis für Innere Medizin, Dillingen; Job Harenberg, Institut für experimentelle und klinische Pharmakologie und Toxikologie, Mannheim; Stelian Hartmann, Gemeinschaftspraxis, Eggenfelden; Normann Haßler jun., Kardiologische Praxis, Plauen; Wilhelm Haverkamp, Charité-Universitätsmedizin Berlin-Campus Virchow-Klinikum, Berlin; Karsten Heimbach, Facharztzentrum Innere Medizin im Ärztehaus Rudolf Virchow, Berlin; Sigrid Heinrich, Fachpraxis für Innere Medizin, Berlin; Frank Hertrich, Praxis für Angiologie, Innere Medizin und Allgemeinmedizin, Lebach; René Oliver Hintze, Studienzentrum der kardiolog. Praxisgemeinschaft, Berlin; Thomas Hoch, Gemeinschaftspraxis, Berlin; Andreas Hölscher, Gemeinschaftspraxis Unterm Heilig Kreuz, Fulda; Sybille Jänsch, Gemeinschaftspraxis, Dresden; Ralf

Jordan, Kardiologische Gemeinschaftspraxis, Duisburg; Christiane Kalina, Kardiologisch-internistische Praxisgemeinschaft, Berlin; Peter Kenedi, Praxisgemeinschaft, Frankfurt Am Main; Dirk Killermann, DRK-Krankenhaus Grevesmühlen, Grevesmühlen; Patrizia Kindler, Praxis für Innere Medizin und Kardiologie, Meiningen; Klaus Kleinertz, Medizinisches Versorgungszentrum am Küchwald GmbH, Chemnitz; Markus Knapp, Praxis für Innere Medizin und Kardiologie, Schwäbisch Hall; Michael Kneußel, Gemeinschaftspraxis, Mühlthal; Ulrich Köckeritz, Praxis für Innere Medizin und Kardiologie, Dresden; Christoph Körner, Praxis für Innere Medizin und Kardiologie, Helmstedt; Alfred Krämer, Zentrum für Prävention und Rehabilitation, Siegen; Karl-Heinz Krause, medicoKIT, Institut für klinische Arzneimittelprüfungen, Goch; Ingmar Lange, Gemeinschaftspraxis, Hartmannsdorf; Thorsten Lewalter, Isar Herzzentrum München, München; Hugo Loeber, Praxis für Innere Medizin, Weiskirchen; Stefan Lukannek, Kardiologische Praxis, Lohne; Jens-Uwe Mai, Praxis für Innere Medizin, Kamenz; Andreas Meinel, Kardiologische Gemeinschaftspraxis, Kassel; Frank Mibach, Kardiologische Praxis, Itzehoe; Eckart Miche, Gemeinschaftspraxis, Bünde; Ronald Naumann, MVZ POLYMED, Chemnitz; Andreas Naumburger, Praxis für Innere Medizin, Berlin; E. Persicke, Gemeinschaftspraxis, Besigheim; Thomas Pötsch, MVZ für Innere Medizin, Berlin; Diethard Predel, Praxis für Gefäßmedizin, Nordhausen; Martin Prohaska, Gemeinschaftspraxis, Mühltdorf; Dietrich Reimer, Gemeinschaftspraxis, Anderbeck; Frank Richard, Praxis für Innere Medizin und Kardiologie, Erfurt; Werner Rieker, Kardiologische Praxisgemeinschaft, Berlin; Barbara Rotter-Auell, Praxisgemeinschaft, Darmstadt; Steffen Schaefer, Gemeinschaftspraxis, Querfurt; Ralf-Olaf Schäfer, Herz-Praxis Berlin-Hohenschönhausen, Berlin; Thomas Schäfer, Gemeinschaftspraxis, Kelkheim; Sebastian Schellong, Studienambulanz der GWET-TUD GmbH, Dresden; Karl-Heinz Schermaul, Praxis für Innere Medizin und Kardiologie, Chemnitz; Oliver Scheuermann, Ärztehaus Kornwestheim, Kornwestheim; Petra Schirdewahn, Kardiologische Gemeinschaftspraxis, Salzatal; Norbert Schön, Kardiologie-Mühltdorf a. Inn, Mühltdorf A. Inn; Andreas Schuchert, Friedrich-Ebert-Krankenhaus Neumünster, Neumünster; Bernd Schütz, Gemeinschaftspraxis, Lünen; Ulrike Spengler, Kardiologische Praxis, Machern; Ulrich Staedt, Praxis für Herz- und Kreislauferkrankungen, Speyer; Ludger Stauff, MVZ Lingen, Lingen (Ems); Rainer Steinhard, Zentrum für Innere Medizin und Kardiologie, Dachau; Heiko Stellmach, Kardiologische Praxis, Chemnitz; Hubert Straub, Praxis für Allgemeinmedizin, Wendlingen; Behrus Subin, CardioMed an der Alster, Hamburg; Jens Taggeselle, Kardiologische Praxis, Markkleeberg; Ulrich Tebbe, Klinikum Lippe Detmold, Detmold; Dieter Thiede, Kardiologische Gemeinschaftspraxis, Weinheim; Steffen Tröger, Kardiologische Praxis, Chemnitz;

Lutz H. von Versen, Praxis für Innere Medizin, Berlin; Frank Warzok, Kardiologische Praxis, Gotha; Philipp Wende, Kardiologische Praxis, Aschaffenburg; Dietrich Weritz, Praxis für Innere Medizin, Vöhringen; Karl Wilhelm, MVZ Dachau, Dachau; Andreas Wilke, Kardiologische Praxis, Papenburg; Ulrich Windstetter, Gemeinschaftspraxis, München; Claus-Henning Wolde, KARDIO-MED 3, Heidelberg; Kassim Younossi, Praxis Kardiologie Neue Mitte, Ulm; Sabine Ziolkowski, Praxisgemeinschaft, Oschersleben (Bode);

### **Italy**

Bruno Aloisi, Centro Cuore Morgagni, Pedara; David Antonucci, Ospedale Careggi di Firenze, Firenze; Paolo Bellotti, Ospedale San Paolo, Savona; Sergio Berti, Fondazione Toscana G. Monasterio- FTGM, Massa; Maria Grazia Bongiorno, Azienda Ospedaliero-Universitaria Pisana, Pisa; Michele Bono, Ospedali Riuniti Giovanni Paolo II, Sciacca; Giuseppe Bruni, Dr Giuseppe Bruni, Roma; Paolo Calabro, Azienda Ospedaliera Vincenzo Monaldi di Napoli, Napoli; Luigi Caliendo / Ciro Guastaferrò, Ospedale San Leonardo, Napoli; Alessandro Capucci, Ospedale Le Torrette, Ancona; Francesco Pasquale Carriello, Clinica Tricarico, Marina Belvedere; Domenico Caruso / Maria D'Avino, AORN Cardarelli, Napoli; Gavino Casu, Ospedale San Francesco, Nuoro; Cristina Catena, L'Azienda Ospedaliero - Universitaria "S. Maria della Misericordia" di Udine, Udine; Franco Cavaliere, Ospedale Sacro Cuore, Gallipoli; Roberto Cemin, Azienda Sanitaria dell'Alto Adige, Bolzano; Luigi Collarini, Ospedale Sacra Famiglia-Fatebenefratelli, Erba; Marcello Costantini, Ospedale Santa Caterina Novella, Lecce; Giuseppe de Bartolomeo, Ospedale Civile, Isernia; Giuseppina de Benedittis, Cittadella della Salute, Lecce; Raffaele De Caterina, Ospedali Riuniti Ss. Annunziata, Chieti; Ettore De Lorenzi, Ospedale Ignazio Veris Delli Ponti, Scorrano; Gennaro De Marco, Ospedale G. Moscati, Aversa; Carmine De Matteis, Ospedali San Felice a Cancelli, San Felice A Cancelli; Natale Di Belardino, Ospedale Civile P. Colombo, Velletri; Matteo Di Biase, Azienda Ospedaliera "Ospedali Riuniti" di Foggia, Foggia; Andrea Di Lenarda, Ospedale Maggiore, Trieste; Luigi Di Lorenzo, Reparto di Cardiologia e UTIC del P.O. "Sessa Aurunca", Sessa Aurunca; Salvatore Di Rosa, Ospedale S.Giovanni di Dio, Agrigento; Massimo Elia, Ospedale Civile San Giovanni di Dio, Crotone; Nicolino Esposito, Ospedale Evangelico Villa Betania, Napoli; Raffaele Fanelli, Casa Sollievo Della Sofferenza, S. Giovanni Rotondo; Salvatore Felis, Struttura A.R.N.A.S. "Garibaldi" Presidio "Garibaldi Centro", Catania; Maria Stella Fera, Ospedale San Camillo, Rom; Fiorenzo Gaita, Azienda Ospedaliera San Giovanni Battista, Torino; Patrizio Gatto, Ospedale Moscati, Taranto; Maria Paola Gemmiti, Ospedale Civile di Sora, Sora; Mariagabriella Grimaldi, Clinica San Michele - Maddaloni, Maddaloni Caserta; Giuseppe Ielasi, Azienda Ospedaliera

Riuniti, Reggio Calabria; Davide Imberti, Ospedale Civile di Piacenza, Piacenza; Rocco Lagioia, Istituto Maugeri di Cassano delle Murge, Cassano Delle Murge; Luigi Leonzio, Ospedale "Floraspe Renzetti", Lanciano; Giulio Vladimiro Lettica, Ospedale Civile R. Guzzardi, Vittoria; Armando Liso, Città de Lecce Hospital, Lecce; Maurizio Lunati, Ospedale Niguarda La Granda, Milano; Andrea Macchi, Ospedale Di Circolo, Busto Arsizio; Stefano Maggiolini, Ospedale San Leopoldo di Mandic, Merate; Francesco Magliari, Ospedale Vito Fazzi di Lecce, Lecce; Raffaella Marazzi, Ospedale di Circolo e Fondazione Macchi, Varese; Franco Mascia, Azienda Osp.Civile San Sebastiano, Caserta; Luigi Meloni, Ospedale San Giovanni di Dio, Cagliari; Maurizio Menichelli, Ospedale Fabrizio Spaziani, Frosinone; Michele Modica / Guido Mellilo, Istituto dermopatico Dell'Immacolata, Roma; Daniele Nassiacos, Ospedale di Circolo di Saronno, Saronno; Vincenzo Nuzzolese, Ospedale Umberto I, Altamura; Zoran Olivari, Azienda Ospedaliera Santa Maria di Cà Foncello, Treviso; Gualtiero Palareti, Ospedale S. Orsola, Malpighi, Bologna; Santina Patanè, AO Riuniti Papardo-Piemonte, Messina; Giuseppe Patti, Campus Biomedico, Roma; Daniela Pavan, Azienda Ospedaliera Santa Maria degli Angeli, San Vito Al Tagliamento; Valerio Pecchioli, Osp. Frosinone, Frosinone; Vittorio Pengo, Ospedale Di Padova, Padova; Bruno Pezzulich, Ospedale Villa Maria Pia, Torino; Marcelo Piacenti, Istituto Di Fisiologia Clinica-CNR, Pisa; Giancarlo Piccinni, Ospedale di Casarano Francesco Ferrari, Casarano; Giuseppe Pietravalle, Ospedaliero San Sebastiano, Frascat; Salvatore Pirelli, Azienda Ospedaliera di Cremona, Cremona; Maurizio Porcu, Ospedale Brotzu, Cagliari; Domenico Prinzi, Ospedale San Giuliano, Napoli; Domenico Prisco, Azienda Ospedaliera Universitaria Careggi., Firenze; Riccardo Proietti, Ospedale Luigi Sacco, Milano; Claudio Reverberi, Azienda Ospedaliero-Universitaria di Parma, Parma; Riccardo Riccardi, Ospedale Civile Edoardo Agnelli, Pinerolo; Roberto Ricci, Ospedale Santo Spirito, Roma; Paolo Rubartelli, Azienda Opedale Villa Scassi di Genova, Genova; Antonio Ruocco, Azienda Ospedaliera A. Cardarelli di Napoli, Napoli; Vitantonio Russo, Ospedale Santissima Annunziata di Taranto, Taranto; Raffaele Sanguolo, Ospedale Buon Consiglio Fatebenefratelli, Napoli; Marino Scherillo, Azienda Ospedaliera "G. RUMMO", Benevento; Rosalba Sciacca, Ospedaliero "S. Antonio Abate", Trapani; Salvatore Severino, Casa di Cura Privata "Villa Serena" s.r.l., Cassino; Marco Sicuro, Ospedale Regionale U. Parini, Aosta; Vito Sollazzo, Ospedale San Severo, San Severo; Giuseppe Stabile, Clinica Mediterranea Napoli, Napoli; Giovanni Stanco, Ospedale San Giuseppe Moscati, Avellino; Giuseppe Strano, Ospedale di Francavilla Fontana, Francavilla Fontana; Luciano Sutura Sardo, Ospedale Barone Lombardo, Canicatti; Corrado Tamburino, Presidio Ospedaliero Ferrarotto Alessi, Catania; Sophie Testa, Ao Istituti Ospedalieri, Cremona; Sakis

Themistoclakis, Ospedale dell'Angelo, Mestre; Claudio Tondo, Centro Cardiologica Monzino, Milano; Massimo Trianni, Poliambulatorio Cittadella della Salute, Lecce; Ferdinando Varbella, Ospedale degli infermi di Rivoli, Rivoli; Paolo Verdecchia, Ospedale di Assisi, Assisi; Giovanni Villani, Ospedale Civile, Piacenza; Bruno Villari, Ospedale Sacro Cuore Di Gesu' FBF, Benevento; Massimo Volpe, Azienda Ospedaliera Sant'Andrea, Roma; Roberto Zanini, Azienda Ospedaliera Carlo Poma, Mantova.

### **Spain**

Jose Antonio Alcaron Duque, Hospital Donostia, San Sebastian; Luis Miguel Alvarez de la Fuente, Hospital Miguel Servet, Zaragoza; Carmen Amoros Galito, Centre Medic Cardiologic Sociedad Civil Professional, Barcelona; Isabel Antorrena Miranda, Hospital La Paz de Madrid, Madrid; Jose Maria Asin Guillen, Hospital Rio Carrion, Palencia; Luis Vicente Baragano Pena, Policlinicas Oviedo, Oviedo; Juan Benezet Mazuecos, FJD, Madrid; Vicente Bodi Peris, Hospital Clínico Universitario de Valencia, Valencia; Ramon Bover Freire, Clinico San Carlos, Madrid; Alberto Calderón Montero, Centro de Salud Rosa de Luxemburgo, San Sebastián De Los Reyes/ Madrid; Francisco Calvo, Hospital Meixoeiro, Vigo; David Calvo Cuervo, Hospital Universitario Central De Asturias, Oviedo; Rosa Campo Perez, CHUAC, A Coruña; Manuel Carasol Ferrer, CAP Calafell UPO, Calafell; Jose Francisco Carretero Ruiz, Hospital Quirón, Málaga; Victor Castro Urda, Puerta de Hierro, Majadahonda - Madrid; Alberto Chocano Higuera, Centro de Especialidades Medicas Hermanos Garcia Noblejas, Madrid; Angel Concepcion Clemente, Usp Hospital La Colina, Santa Cruz De Tenerife; Jose Carlos Cordo Mollar, Hospital Santiago Apostol, Vitoria; Francisco Javier Crespo Mancebo, Hospital Universitario Lucus Augusti, Lugo; M. Mar de la Torre Carpena, Hospital Pio Del Rio Hortega, Valladolid; Ernasto Diaz Infante, Hospital Universitario Virgen Macarena, Sevilla; Antonio Eneriz Calvo, Hospital Comarcal, O Barco De Valdeorras, Ourense; Juan Manuel Escudier Villa, Puerta de Hierro, Majadahonda - Madrid; Antonio Esteban Luque, Hospital de Alta Resolución de Benalmádena, Benalmádena/Málaga; Maria Jesus Fernandez Gomez, Hospital Del Bierzo, Ponferrada; Ana Flores Marin, Hospital Quirón Málaga, Málaga; Roman Freixa Pamias, Hospital de Sant Joan Despi Moisés Broggi, S.Joan Despi; Enrique Galve Basilio, Private practice, Barcelona; Augustina Garcia Pascual, Centro de Salud Gamazo, Valladolid; Olga Garcia Vallejo, C. S. los Almedrales, Madrid; Carmen Garrote Coloma, Hospital De Leon, Leon; Juan Pablo Gomollon Garcia, Clinico Universitario Lozano Blesa, Zaragoza; Andrés Grau, Hospital Son Espases, Palma; Gabriel Gusi Tragant, Corporació Sanitària del Parc Taulí, Barcelona; Jose Sergio Hevia Nava, Hospital Universitario Central De Asturias, Oviedo; Rafael Hidalgo Urbano, Hospital Universitario Virgen de la Macarena, Sevilla; Ricardo Izquierdo Gonzales, Hospital Comarcal

De Monforte De Lemos, Monforte De Lemos; Ali-Ibrahim Jaber Houbani, Hospital Consorci Terrassa, Terrassa; Maria Dolores Joya Seijo, Hospital Severo Ochoa, Leganés, Madrid; Carlos Lafuente, Hospital General De Albacete, Albacete; Jose Ramon Laperal Mur, Centro De Especialidades De San José, Zaragoza; Ismael Laplaza, Hospital Can Mises, Ibiza; Sergio Manzano Fernandez, Hospital Virgen de la Arrixaca, Murcia; Francisco Marín Ortuño, Hospital Virgen de la Arrixaca, Murcia; Roberto Martin Asenjo, Hospital Universitario 12 De Octubre, Madrid; Julia Martin Fernandez, Hospital De Leon, Leon; Diego Martin Raymondi, Hospital Santos Reyes, Aranda De Duero; Pilar Mazon Ramos, Complejo Hospitalario Universitario de Santiago, Santiago De Compostela; Salvador Francisco Milone Prado, Hospital Provincial de Ávila, Ávila; Angel Montiel Trujillo, H. U. Virgen de la Victoria, Málaga; Mohamed Monzer Khanji, Hospital de Manzanares, Manzanares; Francisco Jose Monzon Lomas, Hospital Obispo Polanco, Teruel; Javier Mora Robles, Private practice, Málaga; Carlos Moreno Lugris, Hospital Universitario Lucus Augusti., Lugo; Alvaro Moreno Reig, Centro Clínica Adeslas, Ciudad Real; Augusto Ordonez Espana, Hospital El Vendrell, El Vendrell, Tarragona; Jose Miguel Ormaetxe Merodio, Santo Hospital Civil De Bilbao - Basurto, Bilbao; Juan José Parra Fuertes, Hospital Universitario 12 de Octubre, Madrid; Luis Javier Alonso Perez, Hospital San Pedro, Logroño; Alejandro Pérez Cabeza, Hospital de Alta Resolución de Benalmádena, Benalmádena/Málaga; Natalia Pinilla Echeverri, Hospital Ciudad Real, Ciudad Real; Manuel Pique Gilart, Hospital Arnau De Vilanova, Lleida; Yolanda Porrás Ramos, Hospital San Pedro De Alcántara, Alcántara, Cáceres; Elsa Prieto Moniche, Hospital Infanta Sofía, San Sebastián De Los Reyes; Fernando Quirce Andres, Centro de Salud de Alicante Florida, Alicante; Miguel Angel Ramirez Marrero, Hospital Carlos Haya, Málaga; Manuel Rayo Gutierrez, Clinica Cardiorreal, Ciudad Real; Tomas Ripoll, Hospital Son Llatzer, Palma; Maria Robledo Inarritu, Hospital Txagorritxu, Vitoria-Gasteiz; Javier Robles Alonso, Hospital General De Yague, Burgos; Jose Angel Rodriguez Fernandez, Chuac, A Coruña; Alejandro Rodriguez Vilela, Hospital Arquitecto Marcide, Ferrol; Jose Manuel Rubin Lopez, Hospital Universitario Central De Asturias, Oviedo; Jose Manuel Rubio Campal, FJD, Madrid; Eloy Rueda Calle, Hospital Universitario Virgen de la Victoria, Málaga; Ignazio Sainz Hildalgo, Private practice, Sevilla; Julio Sanchez Álvarez, Hospital Virgen Del Camino, Pamplona; Manuel Sanchez Flores, Hospital General De Yague, Burgos; Demetrio Sanchez Fuentes, Hospital Provincial de Avila, Avila; Maria Eugenia Seguro Requejo, Centro de Salud en Alcorcón - Seguridad social, Alcorcón; Miguel Angel Ulecia Martinez, Hospital Universitario San Cecilio, Granada, Granada; Isabel Urena Montilla, Hospital Morales Meseguer, Murcia; Alfonso Varela Román, Chus-Complejo Hospitalario Universitario de Santiago, Santiago De



Compostela; Eugenia Vazquez Rey, Hospital Modelo, A Coruña; José Luiz Zamorano Gomez, University Clinic San Carlos, Madrid; Manuel Jesus Zarauza Navarro, Hospital De Sierrallana, Torrelavega; Francisco Javier Zumalde Otegui, Private practice, Mungia-Vyzcaya.

#### Switzerland

Peter Ammann, Kantonsspital St. Gallen, St. Gallen; Urs Hufschmid, Kantosspital Baden AG, Baden; Tiziano Moccetti, Cardiocentro Ticino, Lugano; Jan Steffel, USZ Universitätsspital Zürich, Zürich.

#### United Kingdom

Rajesh Aggarwal, Basildon Hospital, Basildon; Ameet Bakhai, Barnet General Hospital, Barnet; Graham M. Brown, Bennoch Medical Centre, Kirkcaldy; Jon Brunskill, The Pulteney Surgery, Bath; Robert Cargill, Victoria Hospital, Kirkcaldy; Anoop Chauhan, Victoria Hospital, Blackpool; Adrian Chenzbraun, Royal Liverpool University Hosp, Liverpool; Andrew Clark, Hull and East Yorkshire Hospitals NHS Trust, Cottingham, Nr Hull.; Piers Clifford, Wycombe General Hospital, High Wycombe, Buckinghamshire; Patrick Davey, Northampton General Hospital, Northampton; Jesse Dawson, Institute of Cardiovascular and Medical Sciences, College of Medicine, Veterinary & Life Sciences, University of Glasgow, Western Infirmary, Glasgow; Savio D'Souza, Darent Valley Hospital, Dartford; John Edmond, Weston General Hospital, Weston-Super-Mare; Iain Findlay, Royal Alexandra Hospital, Paisley; Ahmet Fuat, Carmel Medical Practice, Darlington; Stephen Glen, NHS Forth Valley Royal Hospital, Larbert; Jason Glover, Hampshire Hospitals NHS Foundation Trust, Basingstoke; Diana Gorog, East and North Hertfortshire NHS Trust, Welwyn Garden City; Michael Gumbley, Westbury Group Practice, Westbury; Robert Hatrick, Worthing Hospital, Worthing; Rosie Heath, Church View Surgery, Plymouth; Nick Jones, St Chad's Surgery, Radstock; Phillip Keeling, Torbay Hospital, Torquay; Masood Khan, Hemel Hempstead General Hosp, Hemel Hempstead; Kaeng Lee, Birmingham Heartlands Hospital, Birmingham; Gregory Lip, City Hospital, Birmingham; Mehrdad Malekianpour, Wishaw General Hospital, Wishaw; Terry McCormack, Spring Vale Medical Centre Whitby, Whitby; Andrew McCoye, Ecclesfield Group Practice, Sheffield; Daniel McKenzie, Musgrove Park Hospital, Taunton; Andrew Mitchell, Jersey Public Hospital/General Hospital, Jersey; Ayaz Mohammad, University Hospitals of Morecamke bay NHS Foundation Trust, Barrow-In-Furness; St. John Mohr, The Porch Surgery, Corsham; Andrew Moriarty, Craigavon Area Hospital, Craigavon; Rangasamy Muthusamy, Rotherham Dist General Hosp, Rotherham; Sunil Nadar, Good Hope Hospital, Sutton Coldfield; Ian Orpen, St James's Surgery, Bath; John Paisey, Royal

Bournemouth Hospital, Bournemouth; Janice Patrick, Bradford on Avon and Melksham Health Partnership, The Health Centre, Wiltshire; Alastair Pell, Monklands Hospital, Airdrie; Maurice Pye, York Hospital, York; Dai Rowlands, Peterborough and Stamford Hospitals NHS Foundation Trust , Peterborough City Hospital, Peterborough; Stephen Rowlands / Toby Cookson, Bradford Road Medical Centre, Wiltshire; Aram Salehi, Queen's Hospital, Romford; Irina Savelieva, St George's University of London, London; Richard Schilling, St. Bartholomew's Hospital, London; Ewen Shepherd, Freeman Hospital, Newcastle Upon Tyne; Muzahir Tayebjee, Leeds General Infirmary, Leeds; Christopher Travill, Luton and Dunstable Hospital NHS, Luton; Asok Venkatamaran, George Eliot Hospital, Nuneaton; Ian Williams, Norfolk and Norwich University Hospital, Norwich; Andreas Wolff, Whinfield Medical Practice, Darlington; Yuk-Ki Wong, St Richard's Hospital, Chichester; Ado Yusuf, King Street Medical Centre, Cheshire; Azhar Zafar, Danes Camp Surgery, Northampton.
